# Supplementary material for: Microphysical fingerprints in anvil cloud albedo
Source: Copernicus journal article supplement (doi:10.5194/egusphere-2025-1227), 2025-04-01
Supplement: Supplementary file 1 [file egusphere-2025-1227-supplement.pdf]

# Supplementary Information for "Microphysical fingerprints in anvil cloud albedo"

Declan L. Finney<sup>1,2</sup>, Alan M. Blyth<sup>2,1</sup>, Paul R. Field<sup>3,1</sup>, Martin I. Daily<sup>1</sup>, Benjamin J. Murray<sup>1</sup>, Mengyu Sun<sup>4</sup>, Paul J. Connolly<sup>4</sup>, Zhiqiang Cui<sup>1,2</sup>, and Steven Böing<sup>1</sup>

<sup>1</sup>Institute for Climate and Atmospheric Science, School of Earth and Environment, University of Leeds, Leeds, UK

<sup>2</sup>National Centre for Atmospheric Science, Leeds, UK

<sup>3</sup>Met Office, Exeter, UK

<sup>4</sup>Centre for Atmospheric Science, Department of Earth and Environmental Sciences, University of Manchester, Manchester, UK

**Correspondence:** Declan L. Finney (d.l.finney@leeds.ac.uk)

## 1 Introduction

This supplementary information includes evaluation of additional dates and longwave/infrared evaluation of cloud morphology between satellite and model, and individual profiles plots for crystal and snow hydrometeor species separately.

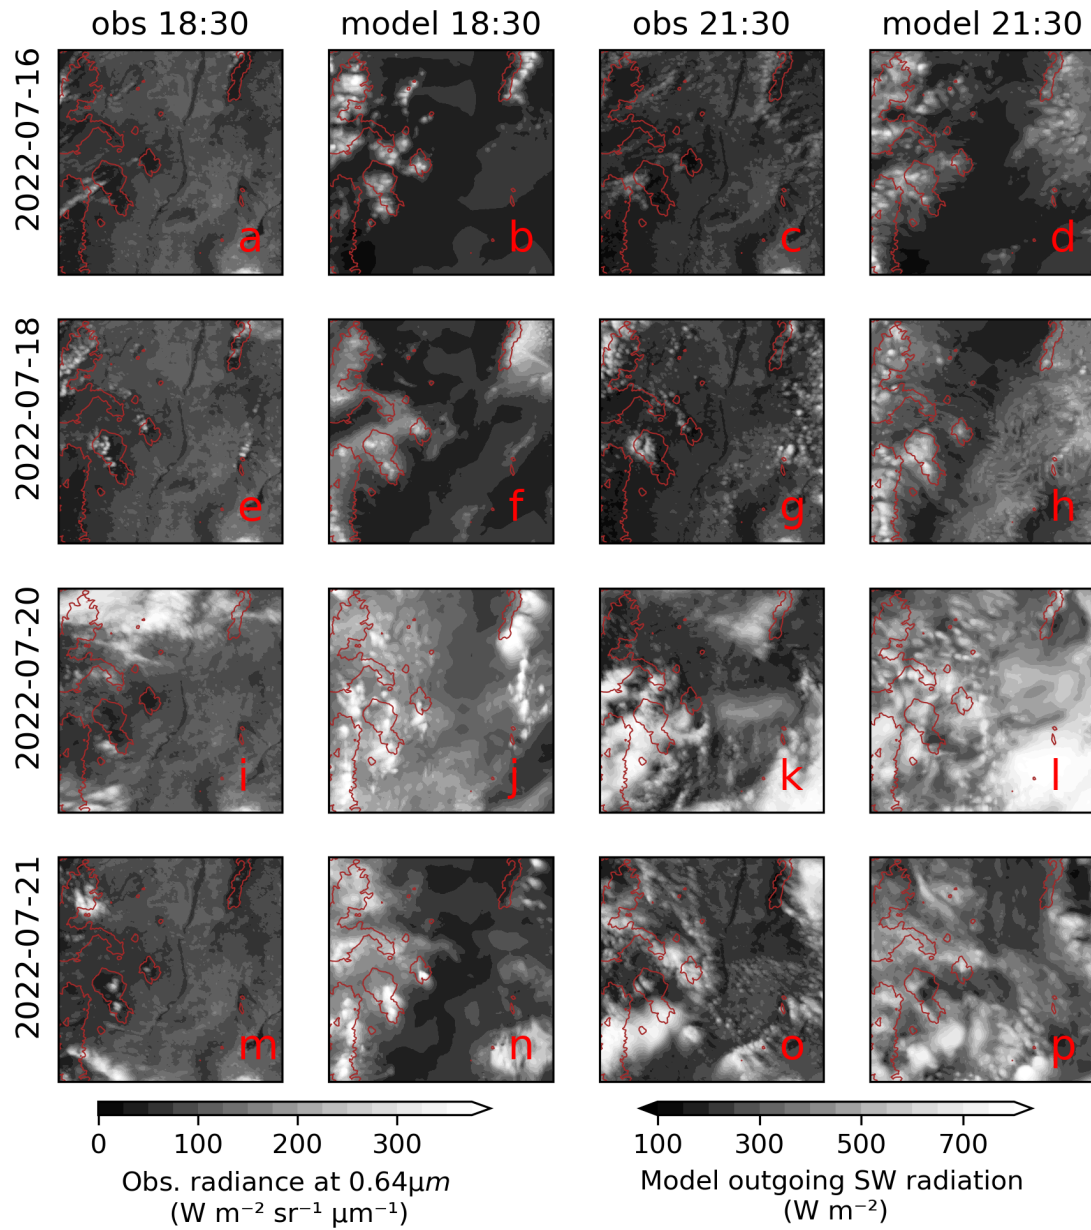

**Figure S1.** Equivalent plots to Figure 3, for cases: 16/jul/2022, 18/jul/2022, 20/jul/2022, 21/jul/2022.

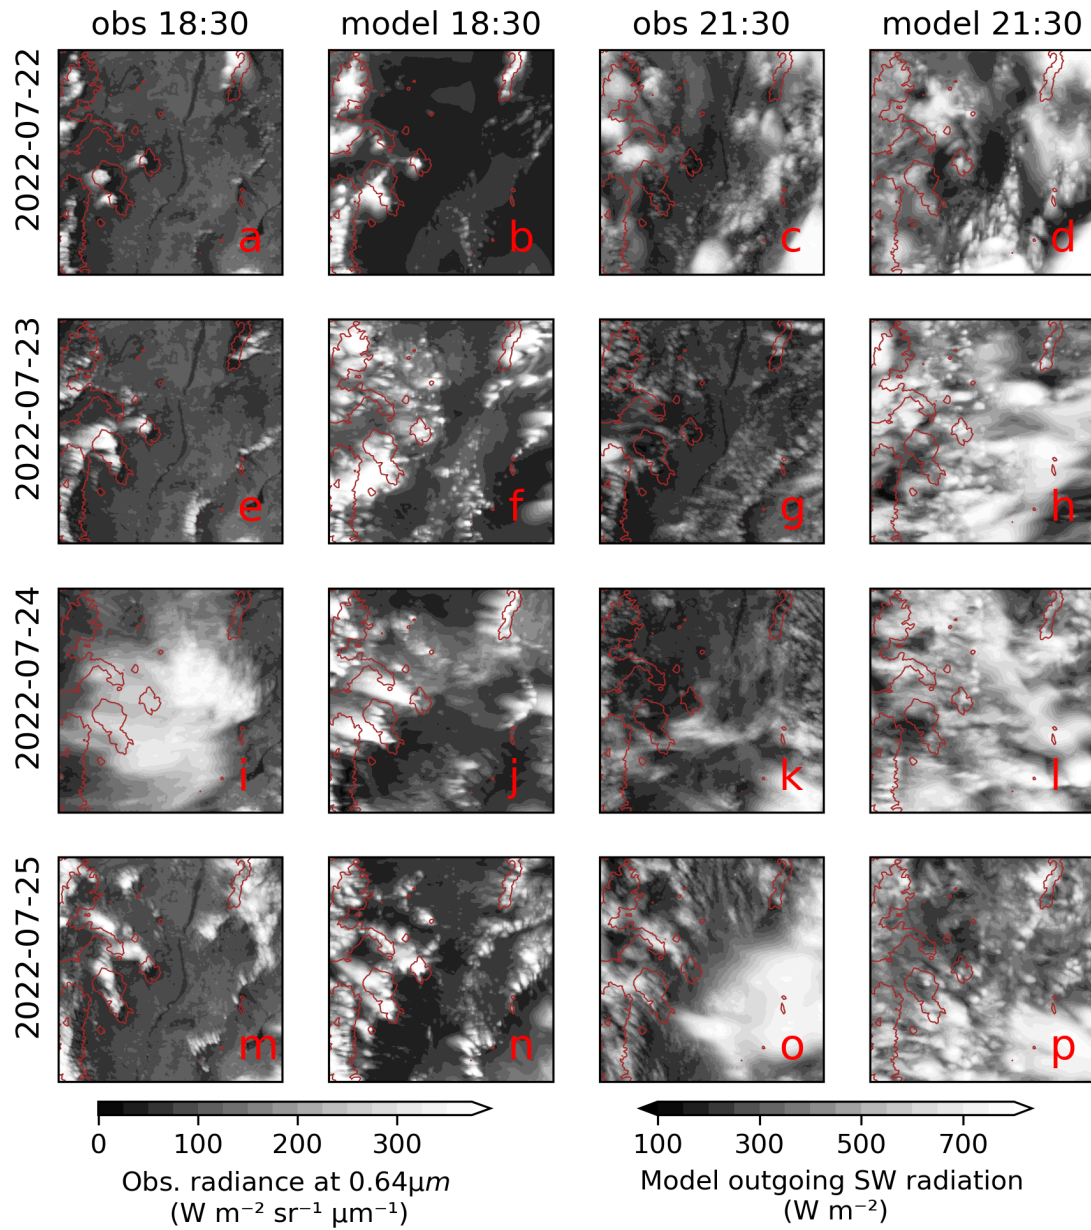

**Figure S2.** Equivalent plots to Figure 3, for cases: 22/jul/2022 to 25/jul/2022

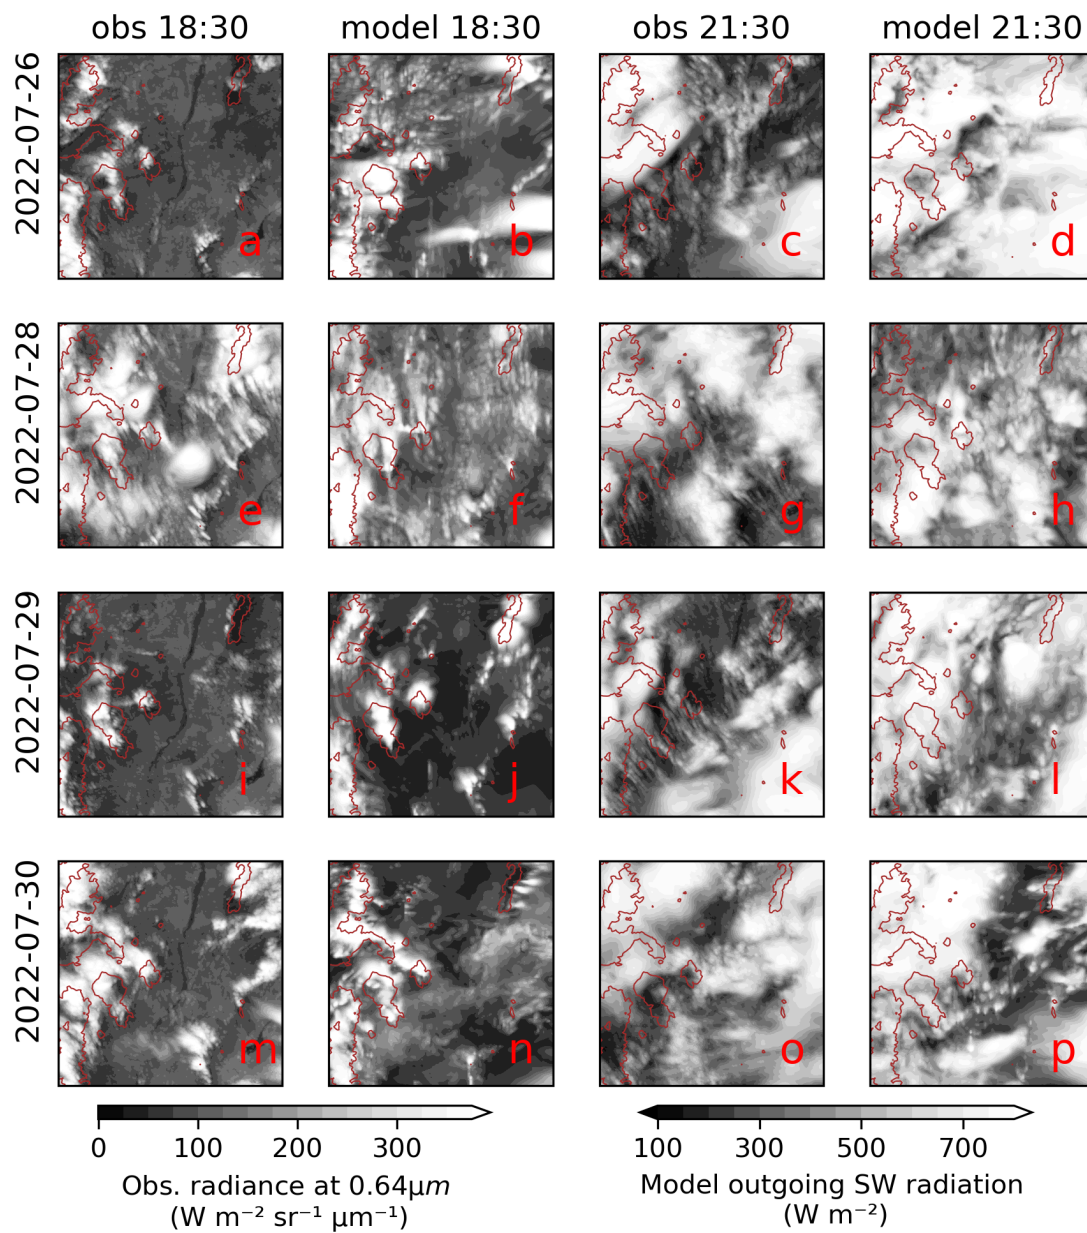

**Figure S3.** Equivalent plots to Figure 3, for cases: 26/jul/2022, 28/jul/2022, 29/jul/2022, 30/jul/2022.

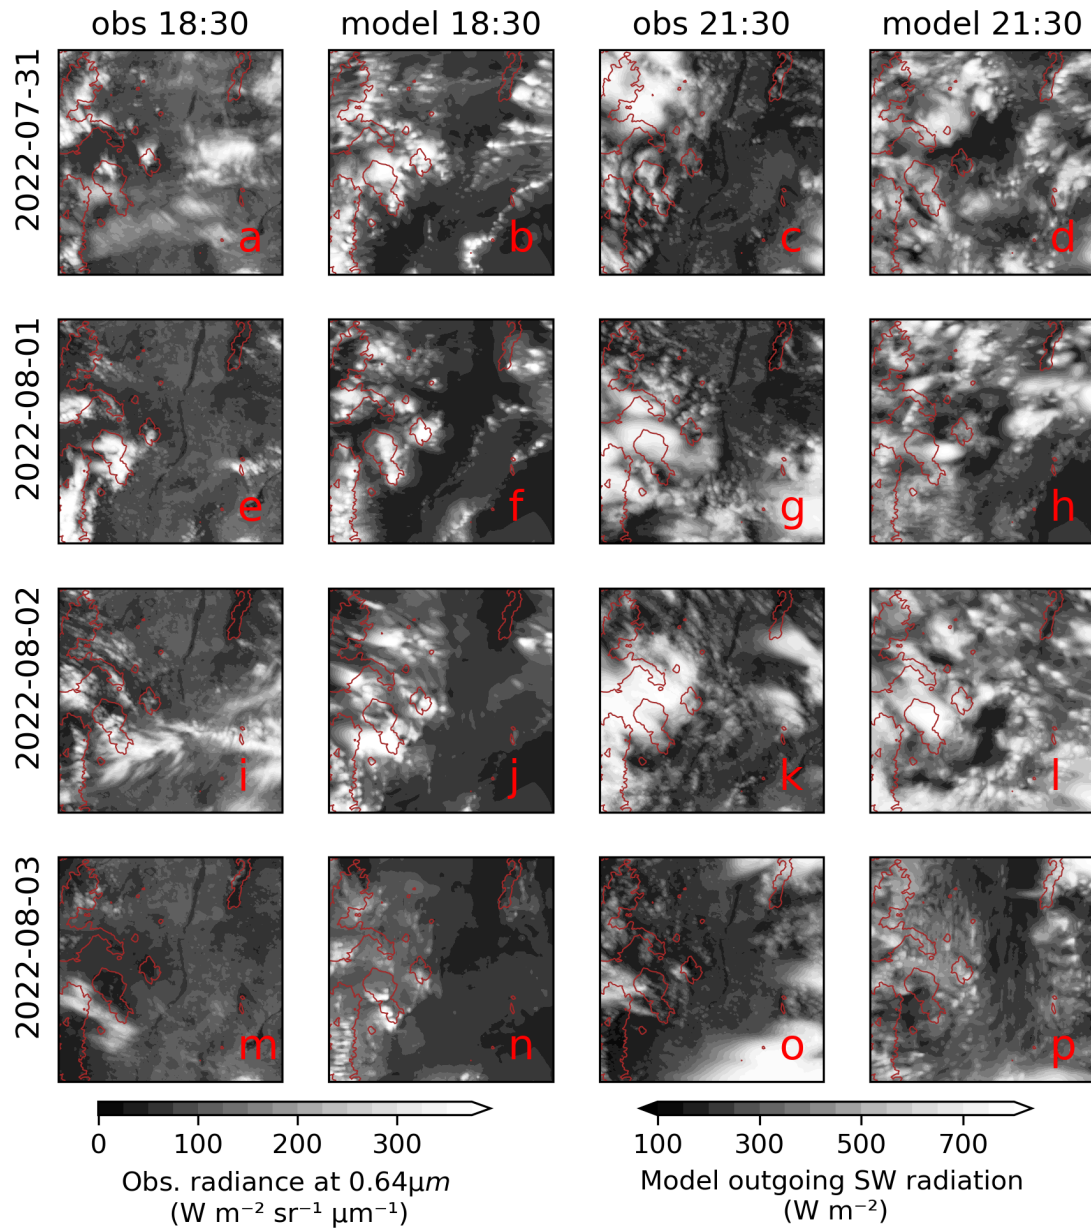

**Figure S4.** Equivalent plots to Figure 3, for cases: 31/jul/2022 to 3/aug/2022.



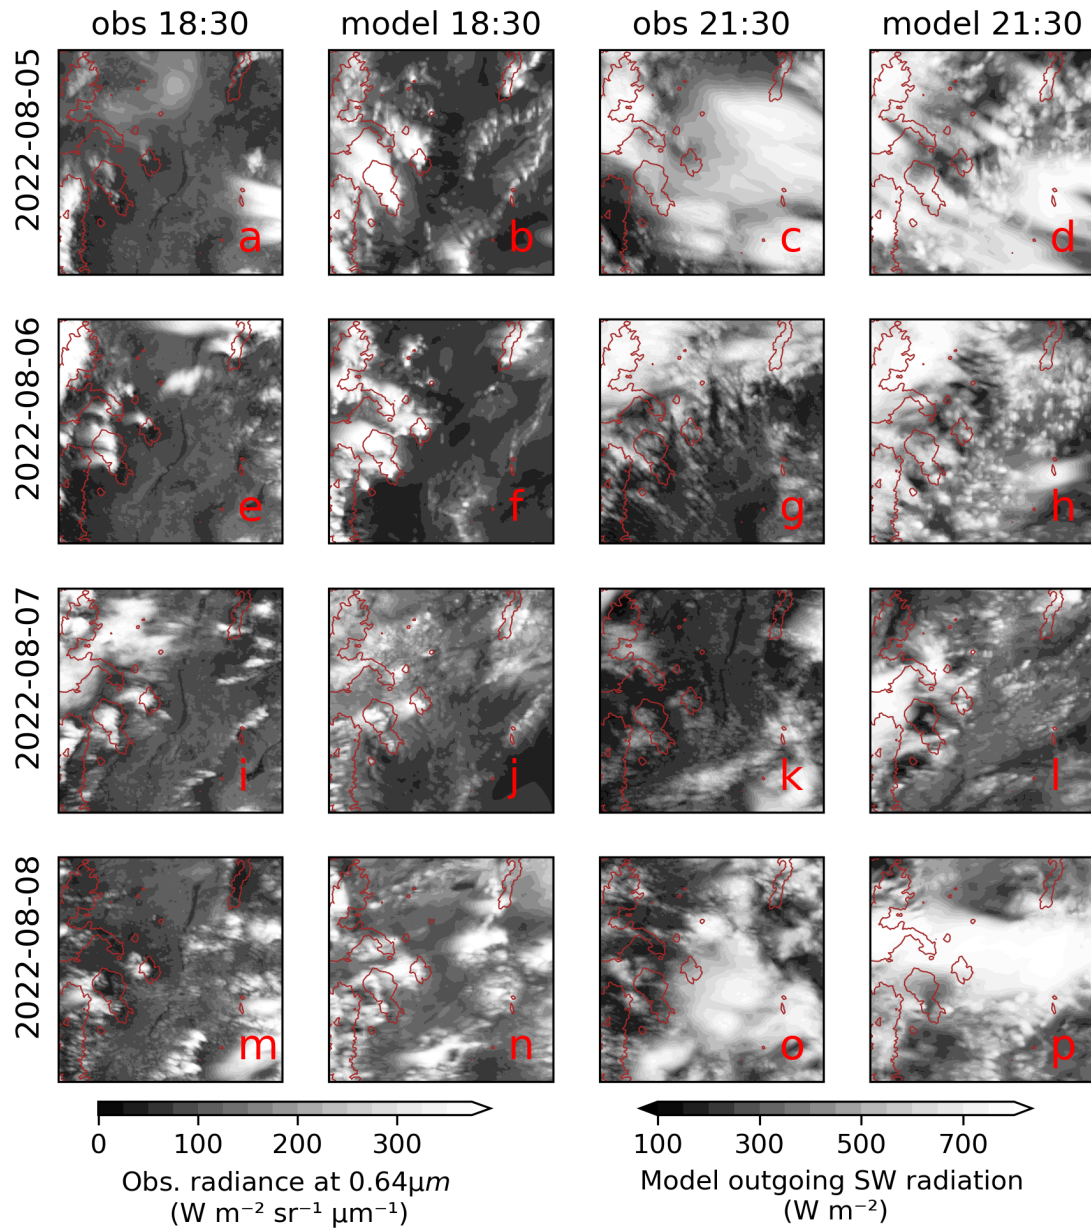

**Figure S5.** Equivalent plots to Figure 3, for cases: 5/aug/2022 to 8/aug/2022.

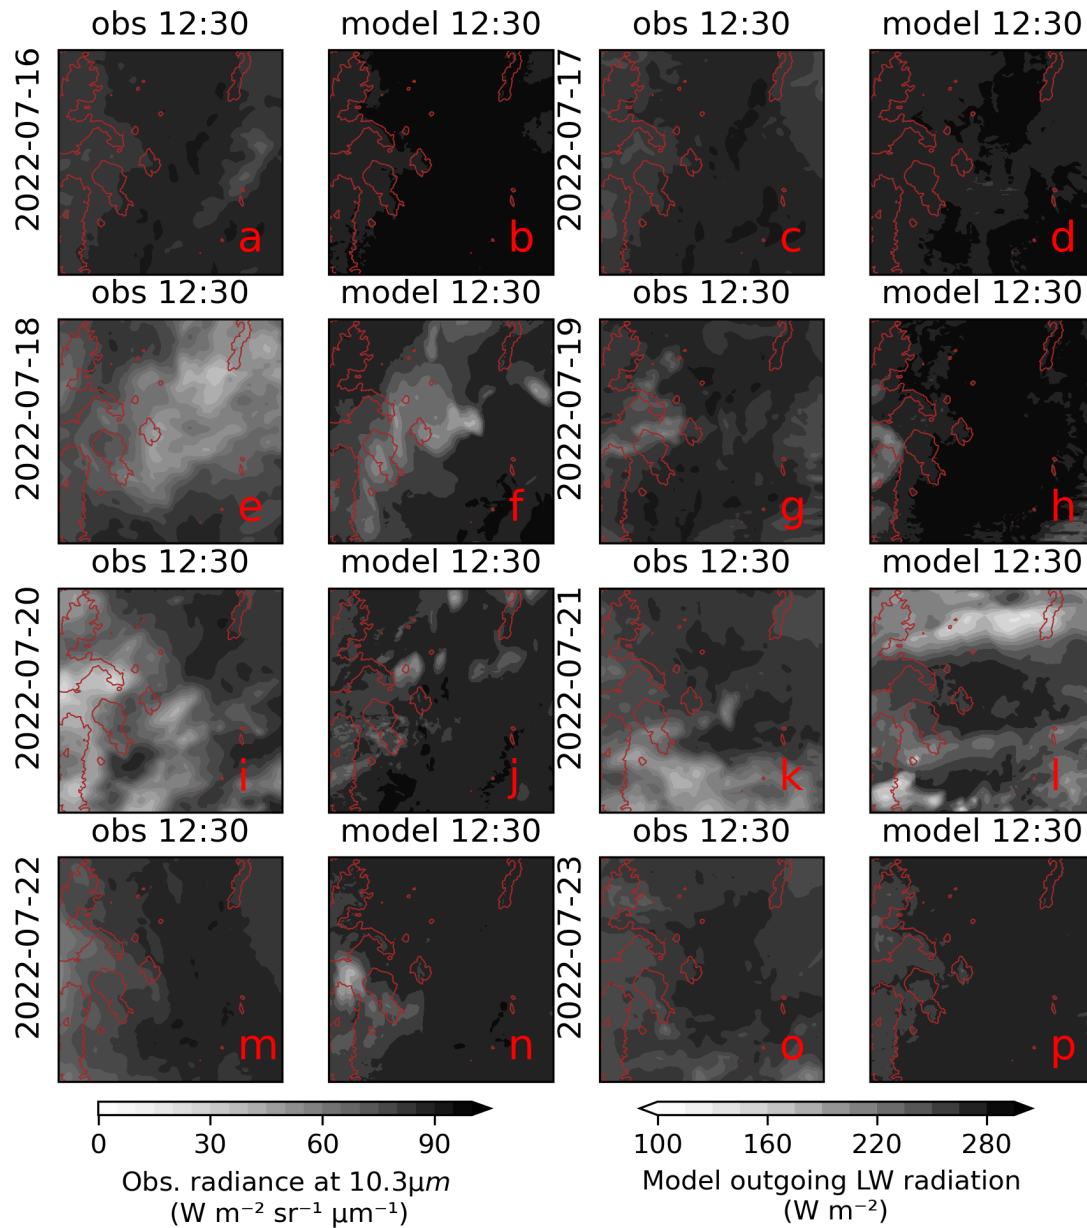

**Figure S6.** Equivalent plots to Figure 3 but using GOES channel 13 infrared radiance for obs, model outgoing LW radiation, and GOES channel 13 which measures infrared radiance. Only a single time, 12:30 UTC, is shown, allowing for two dates to be shown per row of subplots. This figure includes cases: 16/jul/2022 - 23/jul/2022.

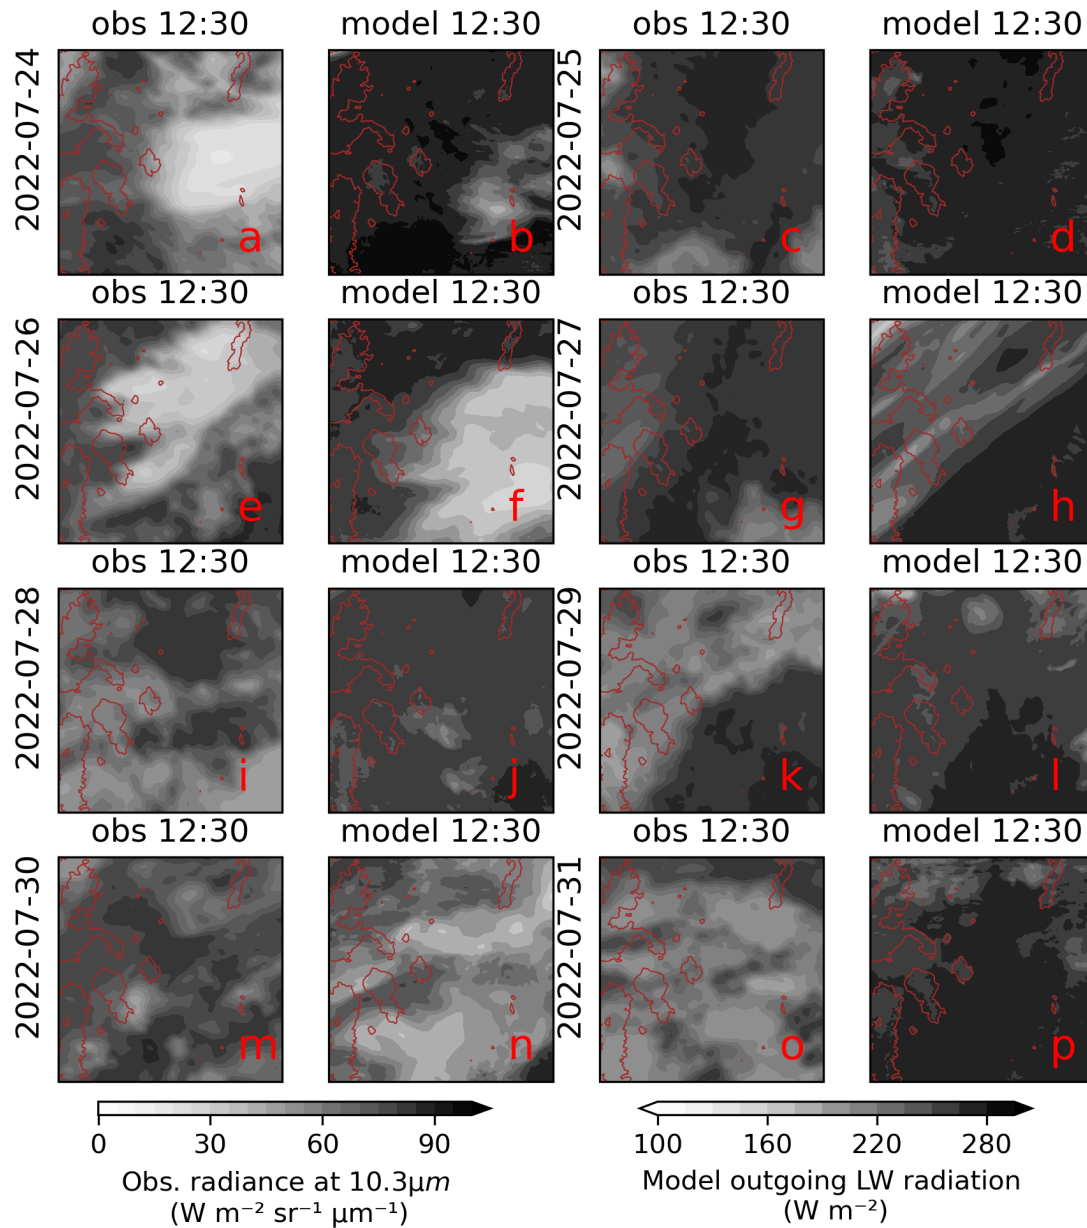

**Figure S7.** Equivalent plots to Figure 3 but using GOES channel 13 infrared radiance for obs, model outgoing LW radiation, and GOES channel 13 which measures infrared radiance. Only a single time, 12:30 UTC, is shown, allowing for two dates to be shown per row of subplots. This figure includes cases: 24/jul/2022 - 31/jul/2022.



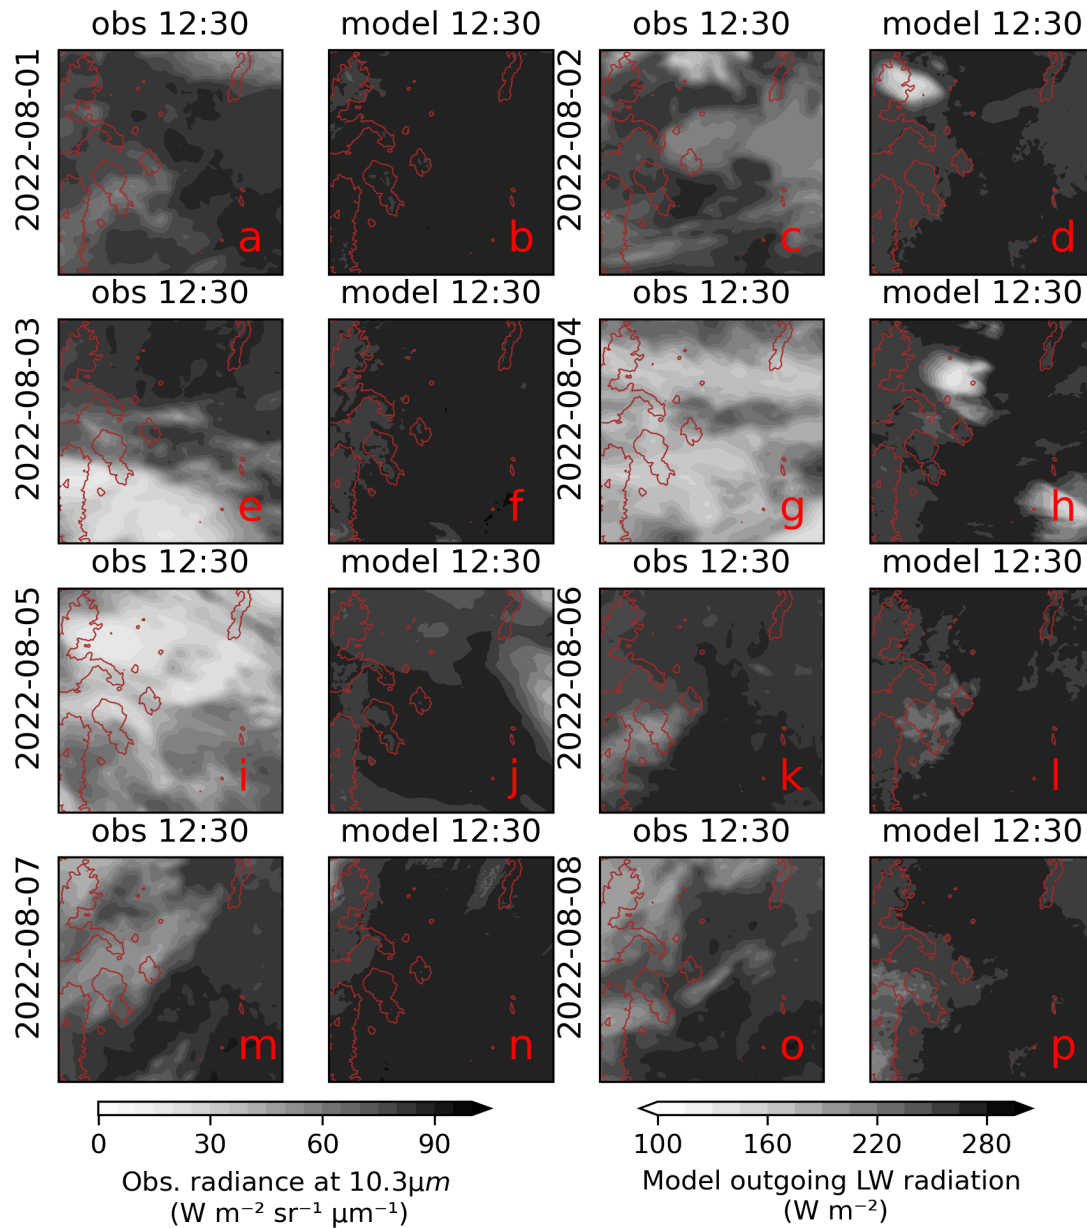

**Figure S8.** Equivalent plots to Figure 3 but using GOES channel 13 infrared radiance for obs, and model outgoing LW radiation, and GOES channel 13 which measures infrared radiance. Only a single time, 12:30 UTC, is shown, allowing for two dates to be shown per row of subplots. This figure includes cases: 01/aug/2022 - 08/aug/2022.

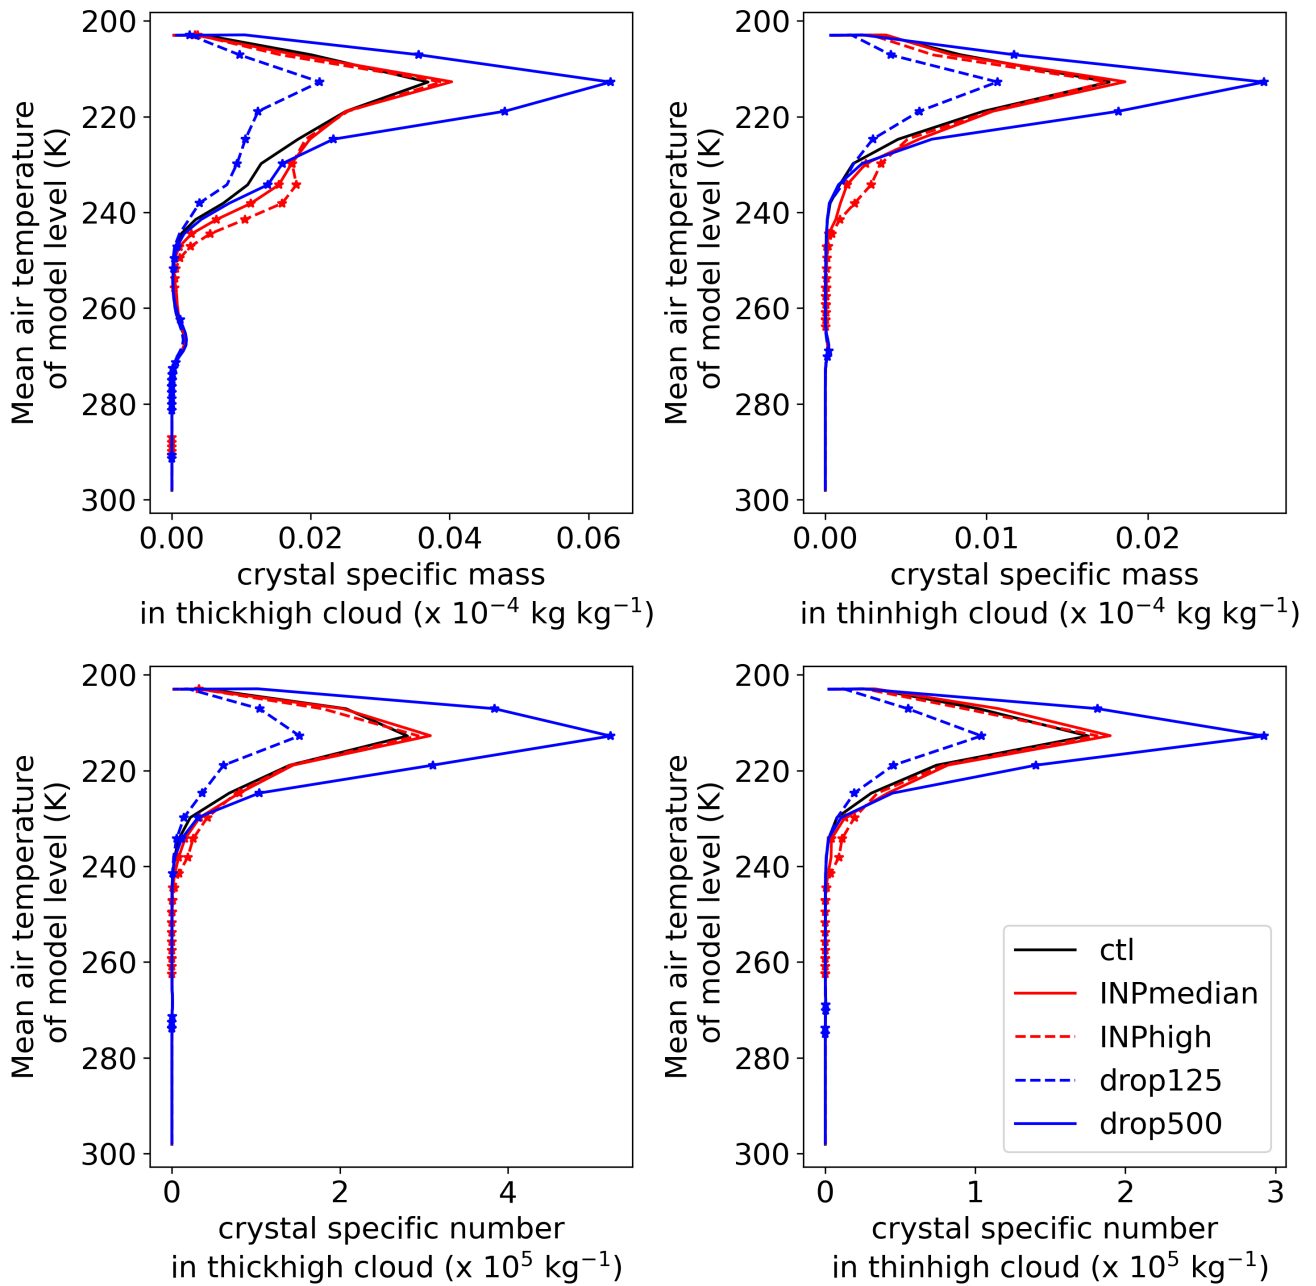

**Figure S9.** Equivalent plots to Figure 8 but for crystal hydrometeors only.

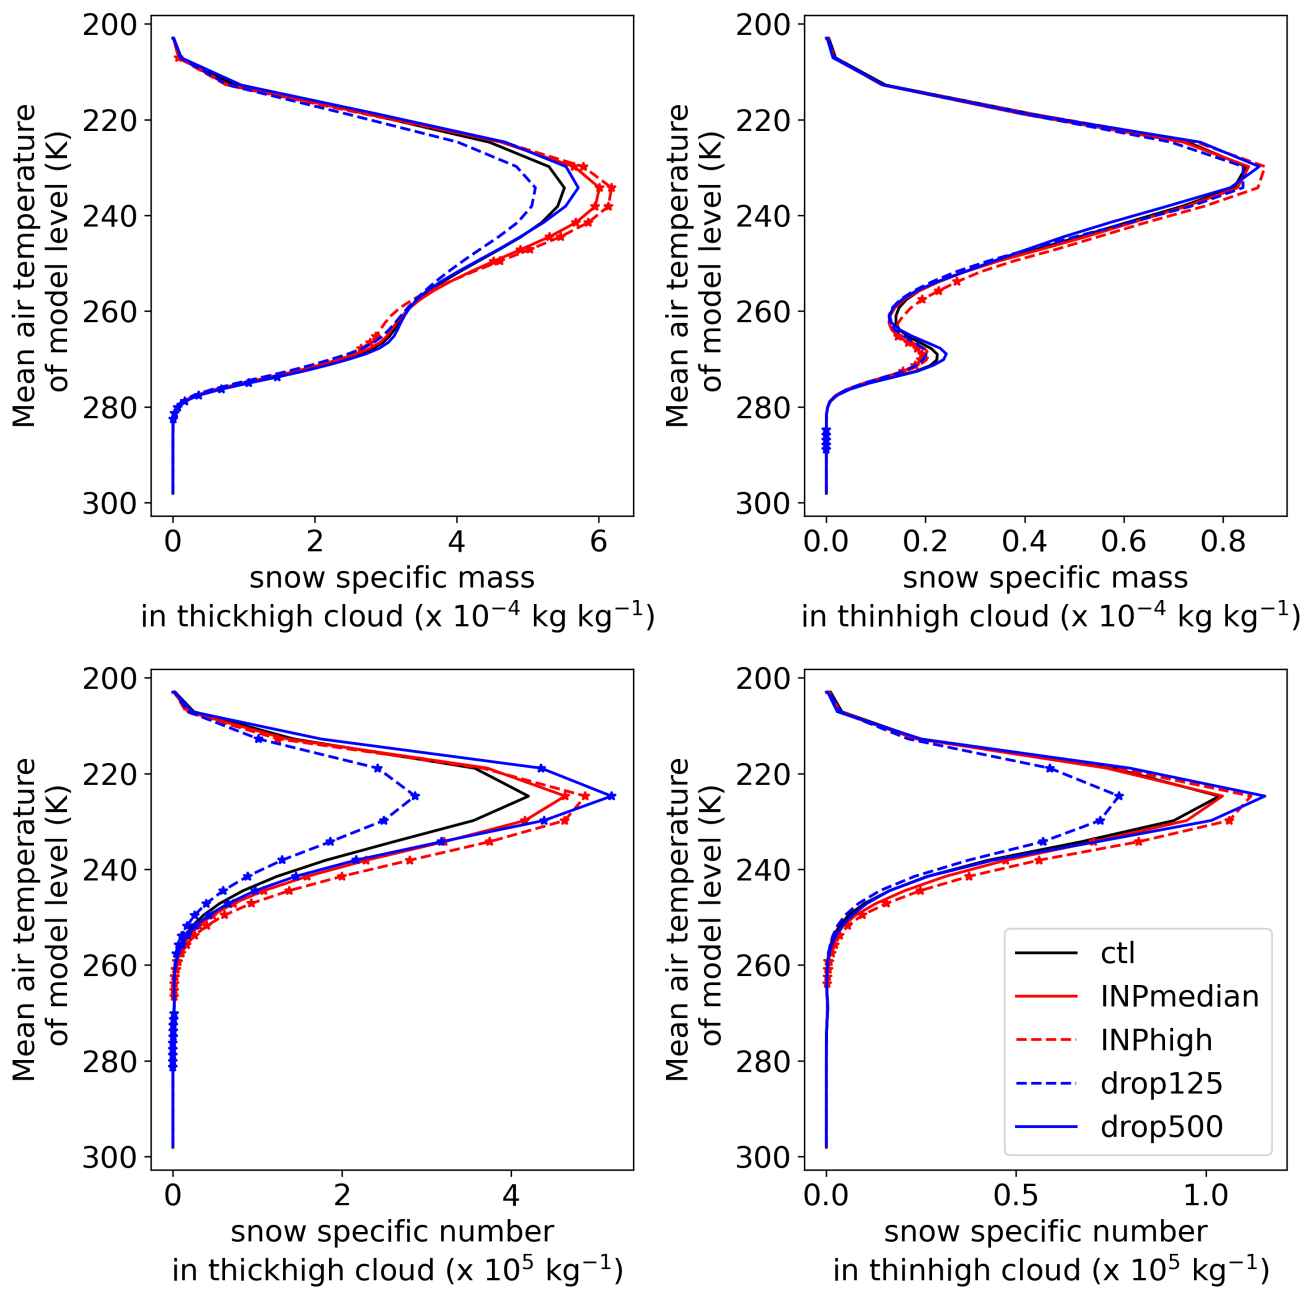

**Figure S10.** Equivalent plots to Figure 8 but for snow hydrometeors only.
